# Supplementary material for: Genetic analysis of DNA methylation in dyslipidemia: a case-control study
Source: Research Square preprint supplement (doi:10.21203/rs.3.rs-113737/v1), 2020-12-01
Supplement: Supplementary file 4 [file abde3d808b6d01d001b58174.xlsx]

## Sheet: Sheet1
Target	Position	Type	P-value(Ttest)	P-value(Utest)	P-value(Logistic)	OR(L95-U95)(Logistic)	MethylDiff	group1 例数	group1 均值	group1 中位数	group1 标准差	group1 最小值	group1 最大值	group1 正态分布检验Wvalue	group1 正态分布检验Pvalue	group2 例数	group2 均值	group2 中位数	group2 标准差	group2 最小值	group2 最大值	group2 正态分布检验Wvalue	group2 正态分布检验Pvalue
AMFR_1_	37	CG	0.97292	0.783877	0.972471	0.9901(0.5626-1.7425)	-2.49746e-05	92	0.00952661	0.00877932	0.00561953	0	0.0297398	0.969152	0.0279885	100	0.00955158	0.00871053	0.00443193	0	0.0225352	0.968675	0.0175167
AMFR_1_	39	CG	0.021317	0.00292574	0.0236611	0.4091(0.1886-0.8873)	-0.00128995	92	0.00588849	0.00494562	0.00417481	0	0.0217391	0.919637	2.84191e-05	100	0.00717844	0.00732273	0.00351713	0	0.0175879	0.97813	0.094949
AMFR_1_	45	CG	0.91072	0.834234	0.910141	0.9736(0.6121-1.5487)	-9.94879e-05	92	0.0143214	0.014408	0.00623298	0.00146843	0.0303359	0.987469	0.53111	100	0.0144208	0.0144759	0.00604084	0	0.0336927	0.993141	0.896429
AMFR_1_	55	CG	0.022158	0.0268549	0.0246037	1.5790(1.0602-2.3517)	0.00246251	92	0.016196	0.0148586	0.00788019	0.0027027	0.0418118	0.950549	0.0015719	100	0.0137335	0.0126113	0.0069091	0	0.0327422	0.951847	0.00110008
AMFR_1_	58	CG	0.22472	0.214436	0.226271	0.6848(0.3709-1.2645)	-0.000837775	92	0.0075197	0.00681247	0.00465472	0	0.0195853	0.968152	0.0237558	100	0.00835748	0.0080477	0.00485678	0	0.0319032	0.877189	1.38268e-07
AMFR_1_	62	CG	0.72286	0.816017	0.721269	1.0946(0.6662-1.7984)	0.000294261	92	0.0132633	0.0131297	0.0055561	0	0.0301003	0.980335	0.179574	100	0.0129691	0.0136616	0.0058953	0.00145138	0.0327273	0.981662	0.178758
AMFR_1_	66	CG	0.85378	0.782882	0.852854	0.9636(0.6510-1.4263)	-0.000193619	92	0.0155136	0.016011	0.0069206	0.00276498	0.0328947	0.982177	0.242018	100	0.0157072	0.0150909	0.00756294	0.0031185	0.0448878	0.942248	0.000265058
AMFR_1_	70	CG	0.73486	0.483534	0.733431	0.8750(0.4057-1.8871)	-0.0001821	92	0.00598976	0.0053135	0.00400007	0	0.0275862	0.863712	1.04037e-07	100	0.00617186	0.00588022	0.00343553	0	0.0167504	0.975664	0.0608202
AMFR_1_	74	CG	0.146596	0.169853	0.14715	0.5387(0.2334-1.2433)	-0.000724796	92	0.0062298	0.00617235	0.00363847	0	0.015083	0.979661	0.160721	100	0.0069546	0.00650141	0.00325094	0	0.0155587	0.97914	0.113898
AMFR_1_	77	CG	0.28172	0.219246	0.276735	0.7064(0.3777-1.3214)	-0.000721725	92	0.00803526	0.00786724	0.00506504	0	0.0242718	0.967908	0.0228293	100	0.00875699	0.00850552	0.00409763	0	0.0195531	0.968862	0.0181004
AMFR_1_	80	CG	0.117418	0.683158	0.119755	0.6760(0.4128-1.1071)	-0.00133779	92	0.016979	0.0182847	0.00643713	0	0.0307087	0.896153	2.1984e-06	100	0.0183168	0.0174799	0.00533294	0.00801833	0.0348297	0.975646	0.0606181
AMFR_1_	95	CG	0.082524	0.104947	0.0839524	0.5781(0.3105-1.0763)	-0.00122285	85	0.0205322	0.0197044	0.00469054	0.0104493	0.0314506	0.981906	0.278934	100	0.021755	0.0214618	0.00479617	0.0106383	0.0340265	0.994557	0.961992
AMFR_1_	101	CG	0.20198	0.153948	0.20173	0.6789(0.3746-1.2304)	-0.000932151	85	0.0212111	0.020654	0.00490248	0.0112732	0.0365025	0.986088	0.496729	100	0.0221432	0.0221066	0.00496098	0.0118946	0.034565	0.991503	0.784182
AMFR_1_	113	CG	0.179484	0.09749	0.181001	0.6380(0.3303-1.2325)	-0.000902667	85	0.013607	0.0130081	0.00478384	0.00575185	0.0344828	0.919587	5.54553e-05	100	0.0145097	0.0137529	0.00432371	0.0047619	0.0288462	0.95806	0.00293136
AMFR_1_	118	CG	0.30954	0.268665	0.30835	1.3653(0.7500-2.4853)	0.000732123	85	0.0140389	0.0134021	0.00440346	0.00298507	0.0267335	0.969632	0.0423093	100	0.0133068	0.01257	0.00523319	0.0027907	0.0256674	0.973837	0.0437703
AMFR_1_	121	CG	0.36552	0.49011	0.364023	0.7677(0.4338-1.3587)	-0.00068717	85	0.0143476	0.0141621	0.00505185	0.00315457	0.0259027	0.984051	0.378825	100	0.0150348	0.0142321	0.00520373	0.00212314	0.035524	0.962823	0.00642433
AMFR_1_	127	CG	0.42796	0.72126	0.438597	0.7986(0.4521-1.4107)	-0.000612345	85	0.0153156	0.0153453	0.00459908	0.00542005	0.0267275	0.991642	0.866939	100	0.015928	0.0153412	0.0058757	0.00662252	0.0567093	0.758154	1.54645e-11
AMFR_1_	133	CG	0.9001	0.965938	0.899436	1.0498(0.4938-2.2321)	7.14331e-05	85	0.00790184	0.00787402	0.00417093	0	0.0262726	0.920828	6.37597e-05	100	0.0078304	0.00739959	0.00355878	0.00106952	0.0190555	0.963781	0.00754855
AMFR_1_	146	CG	0.77944	0.824485	0.778061	0.9079(0.4639-1.7771)	-0.000179513	85	0.010367	0.00985222	0.00434615	0	0.0276243	0.933902	0.000296951	100	0.0105465	0.00961651	0.00433203	0	0.0228833	0.964193	0.0080948
AMFR_1_	148	CG	0.85982	0.882821	0.858888	1.0698(0.5085-2.2506)	0.000101943	85	0.0109739	0.010665	0.00392344	0.00316456	0.0231092	0.956439	0.00590655	100	0.0108719	0.0103919	0.00389316	0.00350385	0.0242616	0.975352	0.0574964
AMFR_1_	150	CG	0.6737	0.353893	0.671871	0.8429(0.3823-1.8584)	-0.000229607	85	0.00856037	0.00821918	0.00397587	0.00149477	0.0219459	0.922316	7.54776e-05	100	0.00878997	0.00828061	0.00342926	0.00242131	0.0181992	0.98118	0.164094
AMFR_1_	157	CG	0.85924	0.870876	0.858304	1.0580(0.5695-1.9656)	0.000122943	85	0.01269	0.0123153	0.00464596	0.00456621	0.0244275	0.970517	0.0485146	100	0.0125671	0.0122903	0.0047315	0.00408998	0.024975	0.975079	0.0547343
AMFR_1_	187	CG	0.52828	0.640517	0.52664	1.1947(0.6888-2.0722)	0.000492796	85	0.0119062	0.0115911	0.00557648	0	0.0350195	0.946826	0.00155802	100	0.0114134	0.0112277	0.00502749	0.00294551	0.0358362	0.923669	2.21532e-05
AMFR_1_	197	CG	0.63186	0.79672	0.629877	0.8458(0.4281-1.6712)	-0.000303365	85	0.00961114	0.00913242	0.00402559	0.00232019	0.0244186	0.961463	0.0122802	100	0.0099145	0.0093334	0.0044928	0.00217155	0.0238095	0.964458	0.00846695
AMFR_1_	207	CG	0.0150793	0.00708053	0.0172669	0.6114(0.4077-0.9167)	-0.00274176	85	0.0157746	0.0155039	0.00812739	0.00158228	0.04	0.954138	0.00425877	100	0.0185164	0.0185747	0.0070712	0.00534188	0.0456853	0.966863	0.0127835
AMFR_2	27	CG	0.35852	0.791821	0.335573	1.0972(0.9084-1.3253)	0.00261052	76	0.00615726	0	0.022759	0	0.157895	0.299548	2.8922e-17	99	0.00354673	0	0.0108737	0	0.0666667	0.376746	1.40709e-18
AMFR_2	31	CG	0.60534	0.874352	0.604071	0.9409(0.7475-1.1844)	-0.00105801	76	0.00421253	0	0.0117924	0	0.0666667	0.416822	7.9843e-16	99	0.00527054	0	0.014512	0	0.0666667	0.41912	5.51799e-18
AMFR_2	44	CG	0.78962	0.575769	0.788396	0.9790(0.8385-1.1431)	-0.000828781	74	0.00671271	0	0.0206539	0	0.133333	0.369977	3.2846e-16	95	0.00754149	0	0.0194823	0	0.111111	0.451358	3.68577e-17
AMFR_2	52	CG	0.66334	0.445701	0.66174	0.9587(0.7938-1.1580)	-0.00109995	74	0.00573887	0	0.016103	0	0.0833333	0.413542	1.16901e-15	98	0.00683883	0	0.016584	0	0.0714286	0.474581	4.52217e-17
AMFR_2	58	CG	0.54578	0.411383	0.544907	0.9406(0.7714-1.1469)	-0.00147404	74	0.00560315	0	0.0149325	0	0.0769231	0.435801	2.29722e-15	98	0.00707719	0	0.0164432	0	0.1	0.499062	1.09702e-16
AMFR_2	61	CG	0.24916	0.492606	0.233809	1.1098(0.9349-1.3173)	0.00340935	74	0.00813341	0	0.0217997	0	0.121951	0.438555	2.50087e-15	98	0.00472406	0	0.0148374	0	0.1	0.368428	1.33718e-18
AMFR_2	87	CG	0.53578	0.40239	0.535066	0.9360(0.7596-1.1535)	-0.00133388	82	0.00594372	0	0.0141658	0	0.0882353	0.486839	1.93056e-15	100	0.0072776	0	0.0146457	0	0.0769231	0.562025	8.6384e-16
AMFR_2	92	CG	0.078765	0.212792	0.0764501	1.1376(0.9864-1.3119)	0.00627104	83	0.0144146	0	0.0286052	0	0.172414	0.574618	3.86963e-14	100	0.00814356	0	0.0163058	0	0.0769231	0.57323	1.37248e-15
AMFR_2	96	CG	0.92302	0.993711	0.922504	0.9888(0.7876-1.2413)	-0.000186547	82	0.00563085	0	0.0131692	0	0.0882353	0.483949	1.74952e-15	100	0.00581739	0	0.0127515	0	0.0666667	0.527492	2.18507e-16
AMFR_2	106	CG	0.29546	0.629818	0.28136	1.1293(0.9052-1.4088)	0.00222802	82	0.00700388	0	0.0166359	0	0.1	0.490557	2.1925e-15	100	0.00477586	0	0.0106011	0	0.0571429	0.523169	1.84934e-16
AMFR_2	109	CG	0.2011	0.0827154	0.203583	0.8756(0.7134-1.0746)	-0.00286689	82	0.00676336	0	0.0144305	0	0.0731707	0.54241	1.39321e-14	100	0.00963025	0	0.0154462	0	0.0714286	0.684777	2.41683e-13
AMFR_2	115	CG	0.27662	0.661551	0.262332	1.1371(0.9083-1.4235)	0.00219354	82	0.00807151	0	0.0151817	0	0.0625	0.598428	1.22741e-13	100	0.00587796	0	0.0110619	0	0.0416667	0.596951	3.76878e-15
AMFR_2	117	CG	0.61456	0.690319	0.599387	1.0444(0.8881-1.2283)	0.00142215	82	0.0102498	0	0.0220027	0	0.15	0.523509	6.98226e-15	100	0.00882767	0	0.0142633	0	0.0555556	0.677185	1.63609e-13
AMFR_2	121	CG	0.65786	0.304429	0.656938	0.9547(0.7782-1.1713)	-0.000971363	82	0.00538493	0	0.0146957	0	0.0869565	0.429287	2.92055e-16	100	0.0063563	0	0.0146999	0	0.107143	0.488242	4.99699e-17
AMFR_2	124	CG	0.91098	0.428989	0.908092	1.0111(0.8382-1.2198)	0.000265605	83	0.00966491	0	0.0177609	0	0.1	0.616303	2.1112e-13	100	0.0093993	0	0.0135043	0	0.0526316	0.731127	3.05453e-12
AMFR_2	130	CG	0.178941	0.289045	0.182226	1.0575(0.9741-1.1480)	0.00798457	83	0.0210235	0	0.0448627	0	0.285714	0.527856	6.61055e-15	100	0.013039	0	0.03272	0	0.25	0.438958	8.78553e-18
AMFR_2	140	CG	0.032957	0.0185845	0.035567	0.7418(0.5615-0.9800)	-0.00353365	83	0.00528412	0	0.0101989	0	0.0384615	0.580254	4.83285e-14	100	0.00881777	0	0.0117485	0	0.0425532	0.757315	1.46788e-11
AMFR_2	143	CG	0.59848	0.348351	0.596556	0.9402(0.7484-1.1813)	-0.00101315	83	0.00820338	0	0.0132157	0	0.047619	0.67643	3.12087e-12	100	0.00921653	0	0.0126964	0	0.0638298	0.750309	9.54056e-12
AMFR_2	149	CG	0.78806	0.554103	0.786807	1.0137(0.9187-1.1185)	0.00117926	84	0.0312913	0.0303309	0.0277161	0	0.133333	0.909543	2.06562e-05	100	0.030112	0.0258161	0.031082	0	0.216216	0.787668	1.05338e-10
AMFR_2	155	CG	0.34696	0.588207	0.336425	1.0500(0.9506-1.1598)	0.00418517	84	0.0340115	0.0294372	0.032893	0	0.157895	0.880788	1.26026e-06	100	0.0298263	0.024563	0.0260838	0	0.12766	0.905693	2.64518e-06
AMFR_2	161	CG	0.74732	0.544643	0.745752	0.9781(0.8556-1.1182)	-0.00103632	85	0.0216952	0.0178571	0.0229054	0	0.0930233	0.862755	2.31895e-07	100	0.0227315	0.0187325	0.0207586	0	0.0789474	0.905217	2.50816e-06
AMFR_2	164	CG	0.58432	0.681585	0.582492	0.9630(0.8419-1.1015)	-0.00176368	85	0.0203717	0.0172414	0.0204516	0	0.0961538	0.872039	5.12661e-07	100	0.0221354	0.0178628	0.0229046	0	0.129032	0.847206	9.36303e-09
AMFR_2	167	CG	0.26626	0.171973	0.283689	0.9303(0.8152-1.0617)	-0.00387116	85	0.0153514	0	0.0203298	0	0.0740741	0.763858	2.27647e-10	100	0.0192225	0.0148156	0.0268105	0	0.210526	0.634211	2.01632e-14
AMFR_2	170	CG	0.9221	0.536941	0.921568	0.9924(0.8519-1.1560)	-0.000275386	85	0.0169263	0.0140845	0.020766	0	0.0810811	0.805465	3.16756e-09	100	0.0172017	0.0156288	0.0174845	0	0.0697674	0.869617	6.7655e-08
AMFR_2	173	CG	0.4003	0.798613	0.388138	1.0713(0.9161-1.2528)	0.00238284	84	0.0168824	0.00520833	0.0212071	0	0.1	0.794137	1.74463e-09	100	0.0144996	0.0139867	0.0162101	0	0.0769231	0.835484	3.5754e-09
AMFR_2	175	CG	0.49988	0.929812	0.490033	1.0564(0.9040-1.2344)	0.00190253	85	0.0114937	0	0.0211021	0	0.1	0.61805	1.53866e-13	100	0.00959113	0	0.016359	0	0.0909091	0.653958	5.15679e-14
AMFR_2	178	CG	0.47254	0.541098	0.470649	1.0711(0.8887-1.2910)	0.00166127	84	0.0115872	0	0.0164283	0	0.0655738	0.731958	4.38873e-11	100	0.00992588	0	0.0148565	0	0.06	0.707798	8.22606e-13
AMFR_2	183	CG	0.54512	0.195046	0.544187	0.9527(0.8147-1.1141)	-0.00173497	82	0.00835387	0	0.02085	0	0.133333	0.463757	8.89197e-16	100	0.0100888	0	0.0177544	0	0.0638298	0.628498	1.54711e-14
AMFR_2	188	CG	0.2448	0.270737	0.256104	0.8978(0.7454-1.0814)	-0.00276644	84	0.00708828	0	0.014237	0	0.0526316	0.560554	1.82615e-14	100	0.00985472	0	0.0179107	0	0.0909091	0.622213	1.15988e-14
AMFR_2	193	CG	0.84752	0.721172	0.846527	0.9860(0.8547-1.1374)	-0.000588087	83	0.00989378	0	0.0200836	0	0.1	0.568258	3.01884e-14	100	0.0104819	0	0.0209593	0	0.1	0.573122	1.36632e-15
AMFR_2	209	CG	0.37974	0.0973626	0.381493	0.9108(0.7387-1.1229)	-0.00193596	82	0.00426781	0	0.0147044	0	0.0833333	0.328728	1.47324e-17	99	0.00620377	0	0.0147402	0	0.0740741	0.491104	6.73961e-17
AMFR_2	212	CG	0.23744	0.60951	0.226906	1.1559(0.9138-1.4622)	0.00236436	82	0.00582277	0	0.0154282	0	0.08	0.438179	3.87345e-16	99	0.0034584	0	0.010279	0	0.0666667	0.388942	2.0699e-18
AMFR_2	217	CG	0.187342	0.469052	0.215057	0.9014(0.7651-1.0621)	-0.00389002	77	0.00542809	0	0.0149398	0	0.0740741	0.421169	7.19293e-16	96	0.00931811	0	0.0234603	0	0.117647	0.46462	4.75107e-17
AMFR_2	222	CG	0.87848	0.59579	0.877634	0.9876(0.8429-1.1572)	-0.000446544	78	0.00731191	0	0.0200475	0	0.1	0.421785	5.79695e-16	95	0.00775845	0	0.0182611	0	0.0714286	0.485138	1.19847e-16
AMFR_2	224	CG	0.0036153	0.00804181	0.0115281	0.7259(0.5662-0.9307)	-0.00690582	75	0.00251436	0	0.00956202	0	0.0434783	0.277227	2.08269e-17	92	0.00942017	0	0.0197009	0	0.0666667	0.528292	1.06366e-15
AMFR_3	94	CG	0.0187242	0.0132777	0.021952	1.2345(1.0309-1.4782)	0.00781278	86	0.0352391	0.0298579	0.0272957	0	0.2	0.670244	1.33875e-12	100	0.0274263	0.0234286	0.0144653	0	0.0732861	0.921023	1.59544e-05
AMFR_3	197	CG	0.38858	0.538061	0.387474	1.0397(0.9518-1.1356)	0.00421167	85	0.090838	0.0851064	0.036249	0.0140845	0.237762	0.898822	6.20043e-06	100	0.0866264	0.0848608	0.0300333	0.0304569	0.167394	0.966507	0.0120223
FBXW7_1	26	CG	0.158061	0.426034	0.155323	1.1800(0.9391-1.4827)	0.00264375	92	0.0129661	0.0108137	0.0146827	0	0.0714286	0.823636	4.1755e-09	100	0.0103224	0.00803329	0.0106411	0	0.047619	0.868994	6.3859e-08
FBXW7_1	31	CG	0.20814	0.17923	0.208659	1.1025(0.9469-1.2835)	0.00344854	92	0.0286872	0.0276504	0.0198989	0	0.0952381	0.950299	0.001516	100	0.0252386	0.0240099	0.0179341	0	0.0851064	0.933575	7.98695e-05
FBXW7_1	38	CG	0.57126	0.553923	0.569971	1.0595(0.8680-1.2931)	0.00117515	92	0.0154861	0.0147067	0.0155017	0	0.1	0.813423	1.98397e-09	100	0.014311	0.0125393	0.0131872	0	0.0731707	0.866087	4.8899e-08
FBXW7_1	45	CG	0.9529	0.461882	0.952023	1.0050(0.8543-1.1822)	0.000151503	92	0.0198053	0.0162181	0.019959	0	0.114286	0.809641	1.51609e-09	100	0.0196538	0.0182059	0.0149334	0	0.0655738	0.947873	0.000602437
FBXW7_1	80	CG	0.93536	0.984443	0.934197	1.0058(0.8766-1.1540)	0.000245673	92	0.0454798	0.0439906	0.0234289	0	0.111111	0.961561	0.00826366	100	0.0452342	0.044559	0.017836	0	0.0909091	0.988897	0.576469
FBXW7_1	85	CG	0.155821	0.048029	0.156846	1.1202(0.9573-1.3107)	0.0037875	92	0.0509173	0.0512823	0.0202042	0	0.105263	0.945506	0.000768085	100	0.0471298	0.0470224	0.0165681	0	0.0880829	0.990348	0.69273
FBXW7_1	94	CG	0.26432	0.24901	0.263964	0.9201(0.7951-1.0648)	-0.00330007	86	0.0616217	0.059256	0.0211472	0	0.115152	0.9743	0.0838394	100	0.0649218	0.0632411	0.0190416	0.0078125	0.132075	0.985268	0.331968
FBXW7_1	101	CG	0.090221	0.181874	0.0881947	0.9271(0.8499-1.0114)	-0.00834384	92	0.0816831	0.0832002	0.0386076	0	0.165217	0.968124	0.02365	100	0.0900269	0.0879024	0.0278699	0	0.177215	0.946277	0.000475537
FBXW7_1	107	CG	0.141223	0.161676	0.143061	0.9036(0.7889-1.0349)	-0.00465411	88	0.0653147	0.0647709	0.0227632	0	0.117117	0.952288	0.00266734	100	0.0699688	0.0715876	0.0204262	0	0.125	0.979101	0.113106
FBXW7_1	113	CG	0.5612	0.443948	0.55918	1.0512(0.8890-1.2431)	0.00146325	88	0.0468592	0.0453754	0.0178469	0	0.1	0.966607	0.0227473	100	0.045396	0.0453943	0.0166063	0.0177515	0.0900901	0.959189	0.00352123
FBXW7_1	116	CG	0.97972	0.950734	0.979588	0.9981(0.8617-1.1560)	-7.29365e-05	88	0.027566	0.0246951	0.019775	0	0.136364	0.840171	2.53127e-08	100	0.0276389	0.0237042	0.0194602	0	0.125	0.877902	1.48088e-07
FBXW7_1	119	CG	0.04002	0.0950976	0.0474576	0.7985(0.6392-0.9975)	-0.00409491	92	0.01171	0.010336	0.0114059	0	0.0490196	0.88989	1.1735e-06	100	0.0158049	0.0119799	0.0158258	0	0.0892857	0.82836	2.03425e-09
FBXW7_1	123	CG	0.88268	0.452907	0.881942	0.9812(0.7640-1.2602)	-0.000243094	92	0.0107342	0.0069525	0.0122277	0	0.0619469	0.823013	3.98704e-09	100	0.0109773	0.0100761	0.0105579	0	0.0645161	0.861575	3.25332e-08
FBXW7_1	129	CG	0.174403	0.0930406	0.176705	0.8686(0.7080-1.0656)	-0.00282664	92	0.0139646	0.0108995	0.0143143	0	0.0756303	0.842402	1.7659e-08	100	0.0167912	0.0156923	0.0143875	0	0.080292	0.897402	1.06939e-06
FBXW7_1	133	CG	0.159722	0.0497079	0.160389	0.8473(0.6722-1.0679)	-0.00261226	88	0.0129004	0.0106579	0.013683	0	0.0526316	0.851229	6.07667e-08	100	0.0155127	0.01421	0.0116884	0	0.045045	0.947904	0.000605197
FBXW7_1	142	CG	0.087141	0.084901	0.102536	0.7975(0.6078-1.0464)	-0.00296832	92	0.007463	0.00501256	0.00951119	0	0.0392157	0.784545	2.76448e-10	100	0.0104313	0.00760456	0.0141198	0	0.103448	0.667411	9.99519e-14
FBXW7_1	150	CG	0.090477	0.128229	0.0933351	0.6778(0.4303-1.0675)	-0.0015955	92	0.00567933	0.00482154	0.00586668	0	0.022508	0.865566	1.2233e-07	100	0.00727483	0.00577231	0.00701551	0	0.035533	0.875934	1.22597e-07
FBXW7_1	153	CG	0.95404	0.566662	0.953747	0.9915(0.7437-1.3219)	-8.25466e-05	92	0.00804249	0.00561957	0.0108683	0	0.0689655	0.721052	6.27942e-12	100	0.00812504	0.00671625	0.00892341	0	0.0470588	0.837413	4.17624e-09
FBXW7_1	158	CG	0.14602	0.405059	0.143766	1.3040(0.9135-1.8612)	0.00175989	92	0.00620747	0	0.00963358	0	0.0416667	0.69722	1.76702e-12	100	0.00444759	0	0.00665255	0	0.0280374	0.718778	1.511e-12
FBXW7_1	166	CG	0.89366	0.381614	0.891646	0.9814(0.7495-1.2851)	-0.00020713	92	0.00767549	0	0.0121192	0	0.0833333	0.652916	1.9903e-13	100	0.00788262	0.00664459	0.00892863	0	0.0344828	0.832588	2.83766e-09
FBXW7_1	170	CG	0.0114191	0.113368	0.0186439	1.3592(1.0525-1.7552)	0.00651482	92	0.0129933	0.00704225	0.0229925	0	0.133333	0.577644	7.37663e-15	100	0.00647844	0.00542009	0.00818155	0	0.0408163	0.78378	8.10106e-11
FBXW7_1	176	CG	0.95964	0.815898	0.959376	1.0061(0.7948-1.2736)	8.83613e-05	92	0.00925439	0.00579832	0.012478	0	0.0666667	0.751154	3.48111e-11	100	0.00916603	0.00676448	0.0116843	0	0.0625	0.758047	1.53621e-11
FBXW7_2	27	CG	0.29274	0.104471	0.289909	0.6764(0.3279-1.3953)	-0.000629108	92	0.00673123	0.00629535	0.00461076	0	0.0344828	0.819249	3.0231e-09	100	0.00736033	0.00698894	0.0035245	0	0.0183299	0.980829	0.154169
FBXW7_2	30	CG	0.052119	0.0253281	0.0557418	0.4253(0.1771-1.0212)	-0.000964904	92	0.00462528	0.00431526	0.00356479	0	0.0211864	0.878105	3.79709e-07	100	0.00559019	0.00517599	0.00327629	0	0.0163265	0.951102	0.000981186
FBXW7_2	34	CG	0.43928	0.743186	0.433573	1.3407(0.6436-2.7927)	0.000462497	92	0.00518991	0.0045559	0.00504749	0	0.04	0.692527	1.38796e-12	100	0.00472741	0.0044688	0.002804	0	0.0126013	0.940396	0.000203846
FBXW7_2	44	CG	0.31696	0.459516	0.316251	1.2428(0.8124-1.9011)	0.00111437	92	0.00818737	0.00640002	0.0101488	0	0.0714286	0.558223	3.37908e-15	100	0.007073	0.00658484	0.00330191	0	0.0160099	0.977899	0.091066
FBXW7_2	49	CG	0.24522	0.883203	0.237966	1.5303(0.7549-3.1022)	0.000718293	92	0.00622209	0.00544996	0.00525825	0	0.0327869	0.838435	1.29074e-08	100	0.0055038	0.00539687	0.00279721	0	0.0131387	0.984909	0.312835
FBXW7_2	54	CG	0.91452	0.0251083	0.911422	0.9770(0.6482-1.4725)	-0.00011118	92	0.00951918	0.00746495	0.0091625	0	0.0666667	0.718964	5.6028e-12	100	0.00963036	0.00966662	0.00394911	0.00107991	0.0229709	0.971779	0.0302945
FBXW7_2	56	CG	0.65932	0.0679865	0.651403	0.8539(0.4305-1.6939)	-0.000275594	92	0.00549795	0.00440405	0.0052672	0	0.0392157	0.72292	6.95703e-12	100	0.00577354	0.00538342	0.00295931	0	0.017094	0.932455	6.87752e-05
FBXW7_2	63	CG	0.173977	0.608544	0.167925	1.5853(0.8235-3.0519)	0.000917522	92	0.00832112	0.00756579	0.00581148	0	0.0366795	0.886835	8.70265e-07	100	0.0074036	0.00695423	0.00288755	0	0.0150517	0.982886	0.221547
FBXW7_2	69	CG	0.43354	0.536085	0.426809	1.1481(0.8166-1.6141)	0.00102972	92	0.0106155	0.00883284	0.0116759	0	0.0851064	0.576001	6.89834e-15	100	0.00958576	0.00889737	0.00485156	0.00228311	0.0413695	0.795695	1.83018e-10
FBXW7_2	75	CG	0.54654	0.391653	0.539515	0.8317(0.4617-1.4983)	-0.000431763	92	0.00849473	0.00820094	0.00565116	0	0.0366492	0.896192	2.20733e-06	100	0.00892649	0.0085165	0.00404338	0.00118624	0.0201168	0.95736	0.0026187
FBXW7_2	78	CG	0.089837	0.0736765	0.0592197	1.8301(0.9767-3.4292)	0.00275002	92	0.0108905	0.00925257	0.0150524	0	0.142857	0.382171	7.34417e-18	100	0.00814052	0.00789079	0.00338147	0	0.0166163	0.985761	0.359849
FBXW7_2	84	CG	0.35374	0.794879	0.342211	1.2720(0.7742-2.0900)	0.000804714	92	0.00989928	0.00855964	0.00750909	0	0.0425532	0.86081	8.09392e-08	100	0.00909456	0.00910599	0.00366946	0	0.0231214	0.977398	0.0831914
FBXW7_2	92	CG	0.83064	0.0281891	0.824458	0.9457(0.5772-1.5494)	-0.00018891	92	0.00455537	0.00379509	0.00807877	0	0.0769231	0.329753	1.52739e-18	100	0.00474428	0.00451216	0.0025879	0.000755287	0.0137195	0.94799	0.000613074
FBXW7_2	96	CG	0.4386	0.433909	0.429336	1.2427(0.7250-2.1300)	0.000616914	92	0.0100653	0.00969308	0.00670407	0	0.047619	0.843503	1.92815e-08	100	0.00944839	0.00839232	0.00377088	0.00245098	0.0229226	0.947668	0.000584316
FBXW7_2	98	CG	0.73198	0.318759	0.727166	0.8884(0.4569-1.7273)	-0.000215851	92	0.00687509	0.00611621	0.00494818	0	0.0311615	0.869054	1.66545e-07	100	0.00709094	0.00661978	0.00360161	0.00103093	0.0248588	0.912566	5.79793e-06
FBXW7_2	129	CG	0.075463	0.0206121	0.0733719	0.6535(0.4102-1.0411)	-0.00171711	92	0.0180239	0.0176838	0.00812685	0	0.0555556	0.927001	6.85479e-05	100	0.019741	0.0186697	0.00448644	0.00981132	0.0319635	0.953263	0.00136952
FBXW7_2	134	CG	0.0113397	0.0170081	0.0122192	0.4542(0.2450-0.8421)	-0.00185682	92	0.0138876	0.0142402	0.00591558	0	0.0323129	0.959102	0.00563918	100	0.0157444	0.015584	0.00379958	0.00804505	0.0279232	0.967434	0.0141116
FBXW7_2	148	CG	0.407	0.291803	0.396474	0.7757(0.4312-1.3953)	-0.000598247	92	0.0126638	0.012222	0.00595343	0	0.03125	0.955931	0.00347859	100	0.0132621	0.0129793	0.00363746	0.00344828	0.0210526	0.981404	0.170762
FBXW7_2	152	CG	0.83248	0.254298	0.826127	1.0453(0.7038-1.5527)	0.000228269	92	0.0128745	0.0119444	0.009771	0	0.0833333	0.621075	4.66575e-14	100	0.0126462	0.0125527	0.00348315	0.00541126	0.0221445	0.974073	0.0456622
FBXW7_2	169	CG	0.71882	0.42329	0.711012	1.0766(0.7286-1.5908)	0.000399899	92	0.00940116	0.00864327	0.00994674	0	0.0909091	0.507728	4.95723e-16	100	0.00900126	0.0086769	0.0039029	0	0.0200893	0.981767	0.182089
FBXW7_2	175	CG	0.86598	0.124756	0.860853	0.9675(0.6690-1.3992)	-0.000195913	92	0.0155728	0.0144929	0.0104652	0	0.0909091	0.637662	9.82199e-14	100	0.0157687	0.0156233	0.00388508	0.00755495	0.0270449	0.988228	0.525167
FBXW7_2	199	CG	0.91428	0.0597831	0.911129	0.9742(0.6151-1.5427)	-9.97997e-05	92	0.00678106	0.00573527	0.00825269	0	0.0714286	0.503746	4.2875e-16	100	0.00688086	0.00672653	0.00340388	0	0.0182371	0.966498	0.0120038
FBXW7_2	209	CG	0.5903	0.755049	0.582563	1.1974(0.6299-2.2760)	0.00036242	92	0.005966	0.00517983	0.00577002	0	0.047619	0.639896	1.0878e-13	100	0.00560357	0.00535571	0.00298416	0	0.0172745	0.947925	0.000607152
FBXW7_3	22	CG	0.0144044	0.12	0.0136321	2.2527(1.1816-4.2946)	0.00180117	84	0.0101033	0.00900515	0.00569266	0	0.0257576	0.934282	0.000339374	100	0.00830213	0.00846665	0.00377533	0	0.0171544	0.98634	0.394817
FBXW7_3	25	CG	0.72192	0.881814	0.712433	1.1514(0.5441-2.4366)	0.000211249	84	0.00811947	0.00808901	0.00454528	0	0.0238871	0.968282	0.0361297	100	0.00790822	0.00713235	0.00324076	0	0.015456	0.97194	0.0311729
FBXW7_3	101	CG	0.40692	0.442276	0.405384	1.4347(0.6130-3.3578)	0.000423046	84	0.00852335	0.00817087	0.00340275	0.000784314	0.0190174	0.969967	0.0467216	100	0.00810031	0.00798648	0.00346837	0	0.0201117	0.964658	0.00875988
FBXW7_3	157	CG	0.23022	0.292893	0.230304	1.6180(0.7371-3.5514)	0.000664553	84	0.0103014	0.00963832	0.00394795	0.00261324	0.0228717	0.960625	0.0115255	100	0.00963688	0.00936477	0.00353661	0	0.0202532	0.950267	0.000863928
FBXW7_3	185	CG	0.9968	0.891692	0.996787	0.9986(0.5107-1.9526)	-2.57866e-06	84	0.0109929	0.0105681	0.00442386	0.00284091	0.0287443	0.96122	0.0125729	100	0.0109955	0.0108027	0.00428664	0	0.0219436	0.99278	0.874413
FBXW7_3	215	CG	0.79148	0.349029	0.790151	0.9035(0.4279-1.9078)	-0.000153138	84	0.00818443	0.00722426	0.00428085	0.00111732	0.0212264	0.949348	0.00235731	100	0.00833757	0.00841049	0.00356525	0	0.0171674	0.989668	0.637828
INSIG1_1	27	CG	0.55868	0.346589	0.556722	0.7364(0.2655-2.0430)	-0.000236971	92	0.00446164	0.00425138	0.00306564	0	0.0136426	0.941927	0.000469462	100	0.00469861	0.00431763	0.00253149	0	0.0124725	0.969271	0.0194442
INSIG1_1	51	CG	0.66046	0.373955	0.658814	0.8509(0.4155-1.7426)	-0.000253632	92	0.00686321	0.00606529	0.003925	0	0.0219207	0.922631	4.04493e-05	100	0.00711684	0.00681058	0.00404952	0	0.0260223	0.875288	1.15272e-07
INSIG1_1	71	CG	0.15024	0.140128	0.150353	0.5984(0.2973-1.2047)	-0.00085535	92	0.00907946	0.0090142	0.00422703	0	0.0193843	0.979605	0.159254	100	0.00993481	0.00965039	0.00397741	0.00237812	0.0192771	0.981021	0.159534
INSIG1_1	96	CG	0.79678	0.893495	0.7935	1.1176(0.4861-2.5698)	0.000128873	92	0.00644957	0.00601275	0.00385816	0	0.03125	0.79137	4.33304e-10	100	0.00632069	0.00577472	0.00296448	0.0010582	0.0174081	0.942866	0.00028957
INSIG1_1	119	CG	0.48952	0.949215	0.482468	1.2149(0.7057-2.0917)	0.000533062	92	0.0227138	0.0218392	0.00603378	0.0130321	0.0484545	0.927179	7.00618e-05	100	0.0221808	0.0222968	0.0044344	0.0101744	0.0326015	0.994587	0.963019
INSIG1_1	121	CG	0.63642	0.380276	0.631001	0.8827(0.5306-1.4686)	-0.000388625	92	0.0223026	0.0225949	0.00634613	0.00809249	0.0527383	0.910689	1.02814e-05	100	0.0226912	0.0226203	0.00485518	0.00921659	0.0354123	0.996246	0.995319
INSIG1_1	143	CG	0.63506	0.380981	0.626443	1.1715(0.6194-2.2158)	0.000316297	92	0.00824151	0.00711536	0.00564775	0	0.0398506	0.739707	1.78647e-11	100	0.00792521	0.00826328	0.00308988	0	0.0183876	0.9787	0.10522
INSIG1_1	148	CG	0.87378	0.770926	0.871556	1.0537(0.5589-1.9867)	0.000104303	92	0.0137332	0.0130863	0.00507441	0.00268456	0.037859	0.925376	5.62414e-05	100	0.0136289	0.0134323	0.0038714	0.00431499	0.0248869	0.985316	0.334599
INSIG1_1	151	CG	0.28654	0.216888	0.28065	1.4143(0.7534-2.6548)	0.000715201	92	0.0131727	0.0126095	0.00524784	0.00127877	0.034749	0.961305	0.0079392	100	0.0124575	0.0119571	0.0038482	0.00620155	0.026936	0.943947	0.000338385
INSIG1_1	161	CG	0.41534	0.532677	0.413736	0.8365(0.5451-1.2835)	-0.000788129	92	0.025554	0.0251642	0.00729064	0.00311526	0.0468966	0.985577	0.408124	100	0.0263422	0.0261123	0.00607132	0.0126812	0.0478655	0.977647	0.0870168
INSIG1_1	167	CG	0.8887	0.881174	0.887974	1.0457(0.5618-1.9464)	9.27411e-05	92	0.0119028	0.011716	0.00488396	0.00190476	0.0262664	0.986803	0.485496	100	0.0118101	0.0112724	0.00428306	0.00274348	0.0261097	0.977575	0.0858894
INSIG1_1	173	CG	0.25832	0.81299	0.252484	1.3684(0.7997-2.3418)	0.000890949	92	0.0104781	0.00874236	0.00621882	0	0.0348469	0.91251	1.2589e-05	100	0.00958713	0.00917398	0.00443321	0	0.027027	0.940763	0.000214653
INSIG1_1	190	CG	0.4258	0.730503	0.424546	0.7541(0.3773-1.5075)	-0.000478779	92	0.00782796	0.00724638	0.00385957	0	0.0266667	0.918576	2.51168e-05	100	0.00830674	0.00737993	0.00440461	0.000980392	0.0232274	0.93507	9.7688e-05
INSIG1_1	195	CG	0.41912	0.289433	0.417464	0.7251(0.3333-1.5772)	-0.000431345	92	0.00804825	0.00769413	0.00389267	0	0.0228137	0.937794	0.000270063	100	0.00847959	0.00770322	0.00348836	0.001443	0.0171038	0.96047	0.0043443
INSIG1_1	204	CG	0.64734	0.68221	0.645573	1.1735(0.5935-2.3201)	0.000276546	92	0.00876843	0.00834609	0.00434871	0	0.0254692	0.899984	3.26171e-06	100	0.00849189	0.00780174	0.00401485	0.0021575	0.0209699	0.953132	0.001342
INSIG1_1	225	CG	0.50874	0.530121	0.507212	0.7637(0.3443-1.6939)	-0.000344743	92	0.00720859	0.00712395	0.00368913	0	0.0253521	0.894235	1.81002e-06	100	0.00755333	0.0071608	0.00352479	0.00125156	0.0187793	0.945786	0.000442392
INSIG1_1	236	CG	0.39242	0.441595	0.390694	1.3375(0.6885-2.5984)	0.000532147	92	0.0103433	0.00987051	0.00432816	0.00252525	0.0240642	0.967712	0.0221121	100	0.00981112	0.00954083	0.00426862	0.00129702	0.0232945	0.979565	0.122943
INSIG1_2	24	CG	0.08664	0.0834013	0.100075	0.8309(0.6662-1.0362)	-0.00360528	85	0.00777381	0	0.0124053	0	0.0625	0.676499	2.16736e-12	100	0.0113791	0.00752944	0.0160283	0	0.0869565	0.718325	1.47302e-12
INSIG1_2	29	CG	0.60536	0.944717	0.603383	1.0724(0.8237-1.3963)	0.000834534	86	0.00770287	0	0.0120949	0	0.0465116	0.689508	3.41279e-12	100	0.00686833	0	0.00988852	0	0.0392157	0.730322	2.91563e-12
INSIG1_2	33	CG	0.27424	0.223751	0.274035	0.8612(0.6589-1.1256)	-0.00178137	86	0.00585952	0	0.0103629	0	0.0416667	0.630315	2.15988e-13	100	0.00764089	0	0.0115994	0	0.0449438	0.708085	8.35605e-13
INSIG1_2	35	CG	0.49122	0.205511	0.490008	0.8824(0.6186-1.2587)	-0.000842063	86	0.00369115	0	0.00856146	0	0.0425532	0.503627	1.47007e-15	100	0.00453322	0	0.00807105	0	0.0361446	0.62819	1.52528e-14
INSIG1_2	41	CG	0.171958	0.0424333	0.173768	0.8274(0.6297-1.0872)	-0.0022615	83	0.0062221	0	0.0111609	0	0.05	0.631613	4.06842e-13	100	0.0084836	0	0.0110601	0	0.0454545	0.776731	5.07248e-11
INSIG1_2	45	CG	0.054024	0.0994806	0.0654573	0.7814(0.6010-1.0159)	-0.00335981	83	0.00640608	0	0.00985611	0	0.0322581	0.6923	6.73023e-12	100	0.00976588	0	0.0135302	0	0.0645161	0.749535	9.10137e-12
INSIG1_2	49	CG	0.3254	0.387875	0.325199	1.1342(0.8825-1.4577)	0.00171043	83	0.00879004	0	0.0126332	0	0.0588235	0.726497	3.88648e-11	100	0.00707961	0	0.0108305	0	0.0454545	0.705892	7.414e-13
INSIG1_2	51	CG	0.84374	0.578739	0.839497	1.0261(0.7994-1.3171)	0.000350002	83	0.00725144	0	0.0130403	0	0.0571429	0.627885	3.46166e-13	100	0.00690144	0	0.0104559	0	0.0547945	0.708409	8.50535e-13
INSIG1_2	64	CG	0.56636	0.640667	0.564554	1.0995(0.7962-1.5185)	0.000770865	83	0.0053703	0	0.00957368	0	0.04	0.630694	3.90914e-13	100	0.00459944	0	0.00856729	0	0.0350877	0.607077	5.87709e-15
INSIG1_2	68	CG	0.71278	0.26581	0.711124	0.9621(0.7844-1.1801)	-0.00078886	83	0.0106593	0	0.0158949	0	0.08	0.722064	3.07117e-11	100	0.0114482	0.0101735	0.0130509	0	0.0526316	0.827755	1.94045e-09
INSIG1_2	85	CG	0.101815	0.444341	0.0974322	1.1933(0.9682-1.4708)	0.00406714	83	0.0107906	0	0.0204644	0	0.125	0.578857	4.57277e-14	100	0.00672348	0	0.0101744	0	0.0454545	0.711157	9.8909e-13
INSIG1_2	88	CG	0.21042	0.334934	0.202275	1.2319(0.8940-1.6974)	0.00178292	83	0.00570073	0	0.0106978	0	0.0540541	0.606441	1.39717e-13	100	0.00391781	0	0.00793927	0	0.0416667	0.570007	1.20026e-15
INSIG1_2	100	CG	0.25886	0.118315	0.258428	0.8622(0.6668-1.1150)	-0.00194954	83	0.008357	0	0.0117677	0	0.0454545	0.74231	9.19786e-11	100	0.0103065	0.00803329	0.0114441	0	0.0491803	0.845466	8.09278e-09
INSIG1_2	104	CG/rs541020266	0.030038	0.0280888	0.0326154	1.2340(1.0175-1.4965)	0.00502838	83	0.0207754	0.018018	0.0166214	0	0.0744681	0.934614	0.000385533	100	0.015747	0.0131602	0.0144772	0	0.0666667	0.88464	2.86749e-07
INSIG1_2	110	CG	0.92936	0.97335	0.928869	0.9907(0.8075-1.2156)	-0.000188736	83	0.0127255	0.01	0.0140652	0	0.0588235	0.845917	7.81254e-08	100	0.0129143	0.0102567	0.0145214	0	0.0597015	0.839351	4.88765e-09
INSIG1_2	116	CG	0.45558	0.613183	0.454653	0.9359(0.7868-1.1133)	-0.00191136	83	0.0128124	0.0104167	0.0158695	0	0.0892857	0.774559	5.98618e-10	100	0.0147237	0.0102051	0.0182544	0	0.0895522	0.780778	6.62866e-11
INSIG1_2	119	CG	0.58248	0.699342	0.580349	0.9517(0.7986-1.1342)	-0.00137	83	0.0195573	0.017094	0.016361	0	0.0625	0.926398	0.000145674	100	0.0209273	0.0181818	0.01707	0	0.08	0.931775	6.28475e-05
INSIG1_2	124	CG	0.96174	0.957421	0.96147	0.9964(0.8598-1.1547)	-0.000141633	83	0.0232584	0.0183486	0.0201011	0	0.0869565	0.900679	9.30863e-06	100	0.0234001	0.0199049	0.0196459	0	0.102564	0.906399	2.86294e-06
INSIG1_2	126	CG	0.064438	0.04386	0.0670183	0.8543(0.7218-1.0111)	-0.00499215	83	0.020067	0.0178571	0.0174291	0	0.0779221	0.916328	4.72282e-05	100	0.0250591	0.0240015	0.0185848	0	0.103448	0.932102	6.56279e-05
INSIG1_2	128	CG	0.3613	0.171825	0.359864	0.9381(0.8182-1.0756)	-0.00293906	83	0.0263464	0.0217391	0.0238356	0	0.1	0.911354	2.77444e-05	100	0.0292854	0.0266019	0.0196116	0	0.0958904	0.94427	0.000354618
INSIG1_2	134	CG	0.29178	0.778625	0.277301	1.1005(0.9259-1.3081)	0.00280185	83	0.0174057	0.0119048	0.0205594	0	0.125	0.786832	1.27899e-09	100	0.0146038	0.01102	0.0138472	0	0.0568182	0.895267	8.52617e-07
INSIG1_2	138	CG	0.76198	0.719205	0.760496	1.0220(0.8885-1.1756)	0.000940398	83	0.0274289	0.025974	0.0208513	0	0.1	0.94168	0.000929511	100	0.0264885	0.0235757	0.0209002	0	0.109756	0.92423	2.37662e-05
INSIG1_2	147	CG	0.79248	0.743952	0.791155	1.0286(0.8349-1.2672)	0.000547843	83	0.0133995	0.0117647	0.0140759	0	0.0689655	0.84964	1.04395e-07	100	0.0128516	0.00948059	0.0139413	0	0.06	0.851084	1.30074e-08
INSIG1_2	152	CG	0.140584	0.144663	0.141771	0.8753(0.7329-1.0455)	-0.00371064	83	0.0147782	0.0121951	0.0162356	0	0.0615385	0.843634	6.55409e-08	100	0.0184888	0.0168079	0.0174027	0	0.0769231	0.895446	8.68862e-07
INSIG1_2	159	CG	0.105981	0.0720613	0.109334	1.1332(0.9724-1.3206)	0.00470412	83	0.0269656	0.025641	0.0211439	0	0.0952381	0.934541	0.000382117	100	0.0222614	0.0205134	0.0180255	0	0.115385	0.872924	9.21467e-08
INSIG1_2	164	CG	0.77548	0.606581	0.774039	0.9796(0.8508-1.1278)	-0.000882345	83	0.0265391	0.0238095	0.0223647	0	0.0961538	0.920191	7.21624e-05	100	0.0274214	0.0247601	0.0194137	0	0.0952381	0.94436	0.000359297
INSIG1_2	166	CG	0.43012	0.884058	0.419341	1.0594(0.9210-1.2186)	0.00250955	83	0.0203762	0.0162602	0.0234041	0	0.111111	0.818707	1.05887e-08	100	0.0178667	0.0163934	0.0186128	0	0.105263	0.827453	1.89537e-09
INSIG1_2	171	CG	0.074063	0.148673	0.0719845	1.1414(0.9883-1.3182)	0.00580559	83	0.0221301	0.0172414	0.024406	0	0.114286	0.82463	1.60883e-08	100	0.0163246	0.0139867	0.0179928	0	0.107143	0.795357	1.78763e-10
INSIG1_2	177	CG	0.22516	0.333063	0.225173	1.1377(0.9236-1.4014)	0.00254167	83	0.0137994	0.0113636	0.0152992	0	0.0625	0.84204	5.80271e-08	100	0.0112578	0.00873512	0.0129527	0	0.0512821	0.828281	2.02166e-09
INSIG1_2	184	CG	0.085838	0.0602353	0.087878	0.9157(0.8276-1.0132)	-0.00761833	83	0.0452084	0.0454545	0.030899	0	0.130435	0.949212	0.00249047	100	0.0528268	0.0513723	0.0286781	0	0.16	0.971959	0.0312827
INSIG1_2	186	CG	0.84856	0.805783	0.847553	0.9799(0.7962-1.2058)	-0.000401186	83	0.0103428	0	0.0139841	0	0.047619	0.74926	1.35834e-10	100	0.010744	0	0.0142474	0	0.0675676	0.773219	4.03209e-11
INSIG1_2	192	CG	0.52182	0.737081	0.507867	1.0822(0.8566-1.3671)	0.0012261	83	0.00919953	0	0.0144977	0	0.0625	0.695346	7.82418e-12	100	0.00797343	0	0.0105538	0	0.0444444	0.77166	3.6443e-11
INSIG1_2	196	CG	0.881	0.453238	0.883261	1.0130(0.8523-1.2040)	0.000366741	83	0.0110501	0	0.0142162	0	0.0697674	0.775	6.14886e-10	100	0.0106833	0	0.0188404	0	0.15	0.566759	1.04935e-15
INSIG1_2	206	CG	0.45746	0.176668	0.455631	0.9091(0.7076-1.1678)	-0.00127873	86	0.00852397	0	0.0124048	0	0.0483871	0.726337	2.29759e-11	100	0.0098027	0.00905441	0.0110149	0	0.05	0.829802	2.27739e-09
INSIG1_2	212	CG	0.39678	0.327634	0.395442	0.8924(0.6864-1.1603)	-0.00139833	86	0.00689244	0	0.0105679	0	0.0344828	0.689127	3.34891e-12	100	0.00829077	0	0.0117056	0	0.05	0.741988	5.7798e-12
INSIG1_2	220	CG	0.93646	0.784291	0.936028	1.0087(0.8166-1.2460)	0.000159937	87	0.0093881	0	0.0144201	0	0.0588235	0.705012	6.26669e-12	100	0.00922817	0	0.0129719	0	0.0531915	0.748032	8.30848e-12
INSIG1_2	224	CG	0.111395	0.448838	0.105288	1.1474(0.9715-1.3550)	0.00431475	87	0.0157118	0.0111111	0.0215512	0	0.0909091	0.748503	6.68965e-11	100	0.011397	0.00840395	0.0138424	0	0.05	0.806275	3.87651e-10
INSIG1_3	28	CG	0.73442	0.896574	0.73287	0.8939(0.4693-1.7026)	-0.000217124	92	0.00856768	0.00807156	0.00465024	0	0.020288	0.970449	0.0346533	100	0.00878481	0.00854051	0.00420458	0	0.0240964	0.949478	0.000766505
INSIG1_3	34	CG	0.066256	0.261941	0.0706156	0.4756(0.2125-1.0645)	-0.00100226	92	0.0059812	0.00620966	0.0034131	0	0.0141376	0.979891	0.166929	100	0.00698346	0.00629151	0.00404489	0	0.0280797	0.861593	3.25867e-08
INSIG1_3	51	CG	0.61806	0.988591	0.616341	0.7965(0.3271-1.9395)	-0.000231931	92	0.00492634	0.00501185	0.00311556	0	0.0130976	0.96999	0.0321287	100	0.00515827	0.00428152	0.00330326	0.00077821	0.0217786	0.872084	8.51524e-08
INSIG1_3	58	CG	0.055356	0.208293	0.0627706	1.8455(0.9679-3.5188)	0.00151193	92	0.00741455	0.00604869	0.00683984	0	0.0434783	0.687791	1.09056e-12	100	0.00590261	0.00519773	0.00320348	0	0.0155763	0.950595	0.000908059
INSIG1_3	66	CG	0.0097987	0.0238632	0.0120314	0.3949(0.1912-0.8155)	-0.00159344	92	0.00612391	0.00576795	0.00387313	0	0.0165431	0.970534	0.0351443	100	0.00771735	0.00660449	0.00452857	0	0.0234657	0.900129	1.43373e-06
INSIG1_3	70	CG	0.43146	0.319392	0.459871	1.1227(0.8259-1.5262)	0.00146641	92	0.00796427	0.00563322	0.017532	0	0.166667	0.249423	1.63277e-19	100	0.00649785	0.00572295	0.00322926	0	0.0195904	0.916305	9.01045e-06
INSIG1_3	79	CG	0.26296	0.768939	0.28172	1.2122(0.8539-1.7207)	0.00173923	92	0.0123673	0.0103861	0.0143	0	0.121212	0.443513	5.26429e-17	100	0.010628	0.0105531	0.00406271	0.00215672	0.0285978	0.954624	0.00169468
INSIG1_3	81	CG	0.74674	0.521637	0.740684	1.1139(0.5880-2.1103)	0.000212228	92	0.0123358	0.012649	0.0053908	0	0.03125	0.957991	0.00475523	100	0.0121236	0.0117182	0.00338267	0.00650936	0.0212172	0.956676	0.0023464
INSIG1_3	92	CG	0.9642	0.491693	0.963119	0.9904(0.6594-1.4878)	-4.65035e-05	92	0.0155132	0.0147059	0.0087922	0	0.0625	0.84332	1.90019e-08	100	0.0155597	0.0151242	0.00478862	0.00455927	0.0315518	0.985282	0.332732
INSIG1_3	102	CG	0.928	0.760011	0.92625	0.9704(0.5133-1.8346)	-5.94641e-05	92	0.0102094	0.00960769	0.00536248	0	0.030303	0.959509	0.00600455	100	0.0102689	0.0103699	0.00345168	0.00158983	0.0180505	0.988522	0.547468
INSIG1_3	109	CG	0.119901	0.184464	0.125352	1.5265(0.8888-2.6220)	0.00138862	92	0.0121358	0.011154	0.00762249	0	0.0588235	0.711958	3.83781e-12	100	0.0107471	0.0103104	0.00394346	0.0045819	0.0254854	0.933462	7.86621e-05
INSIG1_3	115	CG	0.35922	0.0522969	0.358709	0.7707(0.4419-1.3441)	-0.000757919	92	0.00771825	0.0068662	0.00680262	0	0.0588235	0.630336	7.04908e-14	100	0.00847617	0.00819015	0.00419679	0.000692521	0.0273556	0.927203	3.46565e-05
INSIG1_3	121	CG	0.72642	0.338722	0.720577	0.9178(0.5736-1.4686)	-0.000315416	92	0.0106957	0.00972113	0.00736714	0	0.0588235	0.7133	4.12422e-12	100	0.0110111	0.0104474	0.00468735	0.00287853	0.0304414	0.946926	0.000523384
INSIG1_3	152	CG	0.33122	0.522482	0.322841	1.2420(0.8082-1.9085)	0.000959633	92	0.0145152	0.0136527	0.00801829	0	0.047619	0.926892	6.76402e-05	100	0.0135556	0.01345	0.0051998	0.00306748	0.0325418	0.964558	0.0086119
INSIG1_3	172	CG	0.60938	0.658525	0.608018	0.8491(0.4544-1.5866)	-0.000339923	92	0.00840915	0.00806676	0.00504653	0	0.0333333	0.841294	1.61705e-08	100	0.00874907	0.00808769	0.00414193	0.00214362	0.0271041	0.838604	4.59954e-09
INSIG1_3	183	CG	0.34606	0.811978	0.396022	1.2076(0.7812-1.8668)	0.00139841	92	0.00889469	0.00697749	0.0137765	0	0.133333	0.31209	9.18743e-19	100	0.00749628	0.00668509	0.00344973	0.00116414	0.0162095	0.957901	0.0028571
INSIG2_	28	CG	0.04818	0.0390033	0.109495	0.8266(0.6546-1.0437)	-0.0117488	32	0.00347222	0	0.0196419	0	0.111111	0.17181	2.79498e-12	51	0.015221	0	0.0336694	0	0.133333	0.516878	1.02852e-11
INSIG2_	40	CG	0.68762	0.97451	0.684463	0.9899(0.9426-1.0395)	-0.0063377	44	0.0875996	0.0839161	0.0695633	0	0.21875	0.923448	0.00621806	63	0.0939373	0.0833333	0.0865092	0	0.333333	0.896331	6.61786e-05
INSIG2_	63	CG	0.60188	0.698631	0.599135	1.0165(0.9563-1.0804)	0.00507759	58	0.0731062	0.0727513	0.0619215	0	0.272727	0.915837	0.000657248	78	0.0680286	0.0645833	0.0511818	0	0.2	0.944659	0.00202185
INSIG2_	69	CG	0.28028	0.179631	0.280103	0.9675(0.9111-1.0273)	-0.0111571	57	0.0624724	0.0526316	0.0591423	0	0.285714	0.857248	7.97307e-06	79	0.0736295	0.0625	0.0592759	0	0.25	0.90686	2.67814e-05
INSIG2_	91	CG	0.151882	0.374533	0.137246	1.0878(0.9735-1.2155)	0.00630161	76	0.019845	0	0.0325276	0	0.125	0.666386	7.44362e-12	98	0.0135433	0	0.0225463	0	0.0833333	0.65858	9.09552e-14
INSIG2_	94	CG	0.6125	0.636972	0.611259	0.9644(0.8384-1.1092)	-0.00171216	76	0.00723148	0	0.0198413	0	0.0952381	0.421226	9.1279e-16	98	0.00894364	0	0.0236581	0	0.133333	0.44311	1.51236e-17
INSIG2_	99	CG	0.29278	0.276532	0.27947	1.1431(0.8970-1.4568)	0.00213577	75	0.00467133	0	0.0147706	0	0.0689655	0.35686	1.77059e-16	98	0.00253556	0	0.0107476	0	0.0714286	0.254033	4.80174e-20
INSIG2_	101	CG	0.85084	0.927348	0.849548	0.9867(0.8592-1.1331)	-0.000818939	57	0.00938936	0	0.0232169	0	0.1	0.471373	5.06637e-13	79	0.0102083	0	0.0262238	0	0.125	0.453271	1.23943e-15
INSIG2_	108	CG	0.29426	0.845585	0.269917	1.1001(0.9286-1.3032)	0.0041946	58	0.00830277	0	0.0273261	0	0.153846	0.348104	1.30166e-14	79	0.00410817	0	0.0151768	0	0.111111	0.30144	1.44075e-17
INSIG2_	125	CG	0.32682	0.134052	0.308403	1.0361(0.9677-1.1094)	0.0119388	53	0.0212306	0	0.0819609	0	0.5625	0.280841	1.14289e-14	76	0.0092918	0	0.0383649	0	0.230769	0.262857	1.11552e-17
MBTPS1_1	29	CG	0.74968	0.932667	0.745547	1.0822(0.6716-1.7437)	0.000278632	92	0.0108556	0.0104937	0.00674373	0	0.0391061	0.884763	7.12456e-07	100	0.010577	0.0105606	0.00515554	0.00196271	0.0249729	0.95863	0.00321513
MBTPS1_1	33	CG	0.85254	0.791883	0.849739	1.0126(0.8893-1.1530)	0.000597176	92	0.113158	0.11287	0.0251472	0.0309278	0.19378	0.971581	0.041806	100	0.112561	0.111232	0.0184827	0.0600522	0.162587	0.988749	0.564993
MBTPS1_1	48	CG	0.28336	0.187927	0.282491	0.7764(0.4894-1.2317)	-0.000965587	92	0.0317742	0.0309309	0.00657744	0.0153061	0.0535373	0.987368	0.524044	100	0.0327398	0.0325389	0.00585772	0.0182648	0.0459653	0.98965	0.63637
MBTPS1_1	53	CG	0.041117	0.0380294	0.0422022	0.6748(0.4618-0.9863)	-0.00235698	92	0.0361438	0.0358521	0.00878398	0.0135747	0.0717703	0.968143	0.0237213	100	0.0385008	0.0379637	0.00687885	0.0200547	0.0613108	0.963355	0.00702516
MBTPS1_1	56	CG	0.54206	0.607647	0.540115	0.8877(0.6064-1.2995)	-0.000661033	92	0.0411983	0.0412685	0.00762247	0.0206186	0.0658277	0.983454	0.296108	100	0.0418594	0.041483	0.00736929	0.0181159	0.0606061	0.98095	0.157526
MBTPS1_1	67	CG	0.024425	0.015731	0.0279285	0.6099(0.3925-0.9478)	-0.00226666	92	0.0343994	0.0340715	0.00664258	0.0211268	0.056391	0.974094	0.0635452	100	0.0366661	0.0361673	0.00715968	0.0154959	0.0670956	0.910163	4.3904e-06
MBTPS1_1	90	CG	0.5694	0.956463	0.567419	0.8780(0.5620-1.3715)	-0.000526941	92	0.0219935	0.0225428	0.00679393	0.00475436	0.0430108	0.982751	0.265128	100	0.0225204	0.021462	0.00601513	0.0126812	0.0414508	0.957589	0.00271689
MBTPS1_1	92	CG	0.709	0.750136	0.707353	0.9129(0.5674-1.4690)	-0.0003234	92	0.0261158	0.0263257	0.00647289	0.0107914	0.042333	0.989847	0.706387	100	0.0264392	0.0269173	0.00550782	0.00906618	0.044293	0.97005	0.0223003
MBTPS1_1	94	CG	0.46202	0.956463	0.452823	1.1492(0.7993-1.6524)	0.000854447	92	0.0267747	0.0254214	0.0094632	0.00775194	0.0627803	0.936046	0.000214785	100	0.0259203	0.0258384	0.00607703	0.00815956	0.052687	0.922604	1.93978e-05
MBTPS1_1	101	CG	0.6564	0.747181	0.654897	1.1182(0.6852-1.8247)	0.000375209	92	0.0210262	0.0205924	0.00637113	0.00516796	0.0563063	0.87701	3.43023e-07	100	0.020651	0.0202532	0.00528134	0.00822481	0.0342556	0.986596	0.41101
MBTPS1_1	112	CG	0.7306	0.852538	0.726818	1.1439(0.5381-2.4315)	0.000189737	92	0.00761789	0.00734009	0.00415716	0	0.0209424	0.976915	0.10185	100	0.00742815	0.00728645	0.00338834	0	0.0216685	0.947343	0.000556712
MBTPS1_1	132	CG	0.88128	0.775902	0.880527	0.9779(0.7305-1.3090)	-0.00021104	92	0.0222532	0.0210816	0.0106186	0	0.0596882	0.952867	0.00220473	100	0.0224643	0.0211367	0.00891642	0.00868878	0.0668693	0.840379	5.31534e-09
MBTPS1_1	134	CG	0.218	0.189239	0.218538	1.2829(0.8627-1.9079)	0.00129456	92	0.0177417	0.0167266	0.00769589	0	0.0426966	0.963944	0.0120445	100	0.0164471	0.0159814	0.00681517	0.00304878	0.0408859	0.970716	0.0250832
MBTPS1_1	151	CG	0.040004	0.0471407	0.0418106	0.3014(0.0950-0.9565)	-0.000751265	92	0.00436479	0.00432229	0.00273819	0	0.0115883	0.97388	0.0613138	100	0.00511606	0.00490143	0.00229046	0	0.0105079	0.985579	0.349311
MBTPS1_2	30	CG	0.63348	0.72103	0.621703	1.1328(0.6903-1.8591)	0.000429945	84	0.0166342	0.0154827	0.00694931	0.0046729	0.0555556	0.798668	2.34449e-09	100	0.0162043	0.0159331	0.00484351	0.00807382	0.0303327	0.973683	0.0425739
MBTPS1_2	48	CG	0.090184	0.0903204	0.0950817	1.4148(0.9413-2.1265)	0.00187117	84	0.017847	0.0175568	0.00798704	0	0.056872	0.889628	2.85038e-06	100	0.0159759	0.0155297	0.00691239	0.00323625	0.0390625	0.968038	0.0156738
MBTPS1_2	62	CG	0.36872	0.534551	0.351497	1.2186(0.8040-1.8470)	0.000994925	84	0.0175079	0.0161194	0.00885745	0	0.0648464	0.825258	1.45602e-08	100	0.0165129	0.0155084	0.00531603	0.00805687	0.0425532	0.90898	3.83442e-06
MBTPS1_2	77	CG/rs79340982	0.9195	0.964536	0.918963	1.0213(0.6810-1.5314)	0.000107752	84	0.0181133	0.0175593	0.00775447	0	0.0454545	0.925491	0.000119457	100	0.0180055	0.0173432	0.00668917	0.00735971	0.0423729	0.931221	5.84119e-05
MBTPS1_2	108	CG	0.99562	0.227273	0.995403	1.0017(0.5640-1.7791)	4.30542e-06	84	0.00910261	0.00800131	0.00633073	0	0.0497238	0.691356	5.3586e-12	100	0.0090983	0.00849162	0.00371279	0	0.0204947	0.973292	0.0396958
MBTPS1_2	114	CG	0.037717	0.0706606	0.0396621	0.5148(0.2734-0.9691)	-0.0014625	84	0.0097817	0.0100252	0.00491541	0	0.0214505	0.989697	0.749548	100	0.0112442	0.010726	0.00455103	0.00180832	0.0257353	0.985048	0.320122
MBTPS1_2	128	CG	0.44434	0.153997	0.43077	0.7481(0.3635-1.5398)	-0.000476148	84	0.00895622	0.00826757	0.0047172	0	0.0277778	0.932445	0.000271479	100	0.00943237	0.0089042	0.00347211	0.00126743	0.0188679	0.980074	0.134713
MBTPS1_2	144	CG	0.47498	0.433249	0.472978	0.7018(0.2668-1.8462)	-0.000321207	84	0.00617084	0.00606756	0.0030223	0	0.0155172	0.96946	0.0432333	100	0.00649204	0.00639133	0.0030393	0	0.0154341	0.983257	0.236298
MBTPS1_2	147	CG	0.62562	0.356227	0.623667	0.8817(0.5332-1.4580)	-0.000421275	84	0.0145561	0.0142713	0.00630706	0	0.0350665	0.950774	0.00286224	100	0.0149774	0.0149893	0.0053858	0.00315956	0.034188	0.971932	0.031131
MBTPS1_2	165	CG	0.51168	0.545141	0.502663	1.2790(0.6228-2.6264)	0.000397955	86	0.00739739	0.00675898	0.00454765	0	0.0267442	0.848923	6.58447e-08	100	0.00699944	0.00619746	0.00354459	0.00132275	0.0240481	0.867813	5.72707e-08
GRINA_1	23	CG	0.71114	0.647037	0.709497	0.9225(0.6035-1.4102)	-0.000362281	91	0.00648785	0.00469484	0.00692931	0	0.03125	0.84999	3.71288e-08	100	0.00685013	0.00435732	0.00656792	0	0.0266667	0.885439	3.10588e-07
GRINA_1	29	CG	0.72838	0.811044	0.726988	0.9371(0.6509-1.3492)	-0.000399228	90	0.00730334	0.00612314	0.00747175	0	0.0409836	0.857924	8.1507e-08	100	0.00770257	0.00591716	0.00826684	0	0.0555556	0.794898	1.73135e-10
GRINA_1	34	CG	0.052942	0.012097	0.0568108	0.7499(0.5577-1.0084)	-0.0028954	90	0.00820493	0.00501407	0.0101343	0	0.0529412	0.771503	1.637e-10	100	0.0111003	0.00919662	0.0103181	0	0.0481928	0.889918	4.88908e-07
GRINA_1	36	CG	0.86784	0.608997	0.86909	0.9756(0.7276-1.3083)	-0.000231	92	0.0069378	0.00598888	0.00768603	0	0.0391304	0.816852	2.53953e-09	100	0.0071688	0.00455233	0.0113111	0	0.0921986	0.578346	1.70054e-15
GRINA_1	49	CG	0.3662	0.658654	0.365389	1.1307(0.8666-1.4752)	0.00140795	92	0.0125798	0.00990196	0.0115856	0	0.0454545	0.881589	5.26447e-07	100	0.0111719	0.00980392	0.00994056	0	0.0564103	0.844895	7.71684e-09
GRINA_1	55	CG	0.51234	0.295974	0.510548	0.8539(0.5335-1.3668)	-0.000577676	92	0.00620434	0.00498905	0.00646124	0	0.0294118	0.849156	3.04622e-08	100	0.00678201	0.00583095	0.00573084	0	0.0253165	0.909073	3.87517e-06
GRINA_1	69	CG	0.09124	0.0235535	0.0936202	1.3918(0.9457-2.0484)	0.00183795	92	0.0100096	0.00851125	0.00729745	0	0.0327103	0.935583	0.000202237	100	0.00817166	0.00595322	0.00767196	0	0.0355556	0.866715	5.17844e-08
GRINA_1	73	CG	0.099478	0.0883009	0.101856	0.7688(0.5611-1.0535)	-0.00222472	92	0.0107752	0.0099505	0.00911103	0	0.0505051	0.893344	1.65467e-06	100	0.0129999	0.0119765	0.00947478	0	0.0412844	0.945168	0.000404124
GRINA_1	86	CG	0.80584	0.969748	0.804646	1.0526(0.7011-1.5804)	0.000248966	92	0.00813156	0.00706934	0.00737586	0	0.03125	0.903734	4.83804e-06	100	0.00788259	0.00732689	0.00663943	0	0.0275862	0.914548	7.31438e-06
GRINA_1	91	CG	0.21452	0.657554	0.212017	1.2538(0.8790-1.7885)	0.00152895	92	0.00933822	0.00694478	0.010038	0	0.0594595	0.746661	2.67269e-11	100	0.00780928	0.00686157	0.00639859	0	0.04	0.89159	5.80752e-07
GRINA_1	98	CG	0.9558	0.640428	0.955502	0.9902(0.6999-1.4008)	-6.5807e-05	92	0.0111759	0.00902307	0.00875502	0	0.0363636	0.921139	3.38965e-05	100	0.0112417	0.0105411	0.00766771	0	0.0331325	0.946492	0.000490854
GRINA_1	102	CG	0.8663	0.817882	0.865451	1.0245(0.7741-1.3560)	0.000247213	92	0.0131097	0.0115468	0.0102235	0	0.0487013	0.932909	0.000143382	100	0.0128625	0.0111628	0.0100829	0	0.0566038	0.869817	6.89195e-08
GRINA_1	114	CG	0.20436	0.127354	0.204416	0.7910(0.5508-1.1361)	-0.00146462	92	0.00914647	0.00808163	0.00832029	0	0.033195	0.90988	9.40376e-06	100	0.0106111	0.00952381	0.00761464	0	0.0403226	0.947237	0.000548032
GRINA_1	118	CG	0.49138	0.703994	0.483912	1.1464(0.7820-1.6804)	0.000771187	92	0.00777633	0.00526374	0.00927206	0	0.0666667	0.722962	6.97339e-12	100	0.00700515	0.00684755	0.00561474	0	0.0230179	0.933241	7.63763e-05
GRINA_1	123	CG	0.65042	0.273288	0.642602	1.0781(0.7846-1.4815)	0.000599118	92	0.00874287	0.00497163	0.0108623	0	0.0526316	0.774079	1.41286e-10	100	0.00814375	0.00665202	0.00676986	0	0.0305677	0.919408	1.30948e-05
GRINA_1	129	CG	0.22662	0.382871	0.222145	1.2364(0.8794-1.7383)	0.00149283	92	0.0128923	0.0116859	0.00944618	0	0.0430108	0.943168	0.000556042	100	0.0113995	0.0106161	0.00737222	0	0.04	0.939508	0.00017994
GRINA_1	152	CG	0.344	0.779389	0.337279	1.1648(0.8529-1.5908)	0.00129652	92	0.0112574	0.00937926	0.011073	0	0.0697674	0.833907	9.07766e-09	100	0.00996085	0.00902258	0.00730067	0	0.04	0.920877	1.56714e-05
GRINA_1	159	CG	0.68926	0.362667	0.687855	0.9454(0.7188-1.2434)	-0.000605168	92	0.0105918	0.00830104	0.0109811	0	0.0661157	0.826959	5.35068e-09	100	0.011197	0.00947191	0.00995831	0	0.0707071	0.815452	7.59929e-10
GRINA_1	168	CG	0.50018	0.801726	0.498597	0.9220(0.7288-1.1665)	-0.00119127	92	0.0143209	0.0125707	0.0118152	0	0.0621469	0.895596	2.07736e-06	100	0.0155121	0.0119765	0.0125571	0	0.0619469	0.862372	3.49419e-08
GRINA_1	171	CG	0.112215	0.116504	0.114637	0.7552(0.5329-1.0704)	-0.00193868	92	0.00991034	0.00919778	0.00851253	0	0.0347222	0.91925	2.71655e-05	100	0.011849	0.0106955	0.00831439	0	0.0509804	0.911917	5.37598e-06
GRINA_1	191	CG	0.69234	0.714826	0.690789	0.9675(0.8223-1.1384)	-0.00100665	92	0.0220449	0.0198435	0.0184472	0	0.112676	0.824035	4.30083e-09	100	0.0230515	0.0185103	0.016752	0	0.0730769	0.920972	1.58559e-05
GRINA_1	198	CG	0.068922	0.0640731	0.0724601	0.7343(0.5243-1.0286)	-0.00233621	92	0.00870075	0.00751494	0.00840402	0	0.0377358	0.869325	1.70631e-07	100	0.011037	0.00944884	0.0092233	0	0.0497512	0.889609	4.73681e-07
GRINA_1	209	CG	0.68788	0.216215	0.683427	0.9572(0.7758-1.1810)	-0.000797201	92	0.0166435	0.0137938	0.015071	0	0.0657277	0.873153	2.4085e-07	100	0.0174407	0.014761	0.0120666	0	0.0588235	0.933329	7.7282e-05
GRINA_1	223	CG	0.47158	0.28517	0.470005	0.9204(0.7350-1.1526)	-0.0013295	92	0.0161675	0.0132026	0.0132173	0	0.0734463	0.865646	1.23195e-07	100	0.017497	0.0152093	0.0123214	0	0.0544554	0.941332	0.000232671
GRINA_2	31	CG	0.051441	0.0599308	0.0546241	0.9393(0.8812-1.0012)	-0.0150432	78	0.03298	0.00461481	0.0462094	0	0.222222	0.744819	2.50198e-10	93	0.0480232	0.037037	0.0528714	0	0.186047	0.845661	2.01267e-08
GRINA_2	37	CG	0.05572	0.0276862	0.0608283	0.9432(0.8873-1.0027)	-0.0147498	86	0.0343961	0.00714286	0.0483197	0	0.25	0.728024	2.51764e-11	96	0.0491459	0.0377493	0.0543462	0	0.269231	0.830092	3.95244e-09
GRINA_2	40	CG	0.99142	0.897396	0.991363	0.9999(0.9783-1.0219)	-0.000217107	85	0.253142	0.263158	0.145495	0	0.64	0.97944	0.192968	95	0.253359	0.258065	0.125063	0	0.586957	0.986556	0.445756
GRINA_2	55	CG	0.1818	0.120347	0.181495	0.9719(0.9321-1.0134)	-0.015968	75	0.0784986	0.0625	0.0772552	0	0.3	0.888032	7.22774e-06	86	0.0944666	0.0869565	0.0736756	0	0.263158	0.934203	0.000282571
GRINA_2	102	CG	0.2106	0.176783	0.210731	0.9604(0.9015-1.0231)	-0.0126475	55	0.0465914	0.0357143	0.0556918	0	0.227273	0.803821	4.17362e-07	77	0.0592389	0.0555556	0.0578121	0	0.217391	0.886047	4.73978e-06
GRINA_2	116	CG	0.2373	0.399063	0.328472	0.9456(0.8452-1.0579)	-0.00772635	62	0.0102502	0	0.0231094	0	0.117647	0.51761	5.75439e-13	88	0.0179766	0	0.054476	0	0.461538	0.340253	5.08044e-18
GRINA_2	133	CG	0.98678	0.682328	0.987522	1.0006(0.9327-1.0733)	0.000143894	50	0.0306657	0	0.0409159	0	0.129032	0.759452	1.14796e-07	77	0.0305218	0	0.0566453	0	0.4	0.543456	4.22172e-14
GRINA_2	146	CG	0.82614	0.651937	0.824292	0.9896(0.9022-1.0854)	-0.00173767	45	0.0329403	0	0.0430054	0	0.176471	0.775014	7.00931e-07	69	0.034678	0.0243902	0.03997	0	0.130435	0.815197	7.29281e-08
GRINA_2	154	CG	0.8558	0.455307	0.853662	1.0064(0.9400-1.0775)	0.00268081	32	0.0558963	0.0625	0.0580744	0	0.230769	0.822863	0.000113057	51	0.0532155	0	0.0692616	0	0.272727	0.774801	1.96605e-07
GRINA_2	156	CG	0.59824	0.732863	0.594007	1.0253(0.9352-1.1241)	0.00550694	33	0.0413588	0	0.0518789	0	0.2	0.77782	1.25288e-05	54	0.0358518	0	0.0440019	0	0.166667	0.784268	1.75185e-07
GRINA_2	165	CG	0.82356	0.819348	0.796291	1.0127(0.9201-1.1147)	0.00439954	19	0.0548844	0	0.0769333	0	0.25	0.749001	0.000226949	32	0.0504848	0.0669643	0.0473567	0	0.133333	0.804597	4.97854e-05
GRINA_2	169	CG	0.3627	0.175144	0.362196	1.0277(0.9691-1.0899)	0.0145138	34	0.0645735	0.0645833	0.068555	0	0.266667	0.851866	0.000308193	55	0.0500597	0	0.0751293	0	0.375	0.705284	3.31809e-09
GRINA_2	173	CG	0.5993	0.568136	0.595279	1.0213(0.9450-1.1037)	0.00593494	37	0.041243	0	0.053904	0	0.1875	0.774879	4.22997e-06	57	0.035308	0	0.052939	0	0.2	0.701812	1.8371e-09
GRINA_2	176	CG	0.61956	0.564117	0.615505	1.0192(0.9462-1.0979)	0.00587386	37	0.0518748	0.0434783	0.0573898	0	0.166667	0.815801	2.75355e-05	57	0.0460009	0.0434783	0.0548382	0	0.2	0.806764	3.41852e-07
GRINA_2	179	CG	0.2481	0.285995	0.248274	0.9330(0.8295-1.0495)	-0.00934966	37	0.0189273	0	0.0324089	0	0.0909091	0.606705	9.44998e-09	56	0.028277	0	0.0411983	0	0.181818	0.711756	3.53882e-09
GRINA_2	205	CG	0.11148	0.204337	0.187507	0.8814(0.7306-1.0634)	-0.023069	14	0.010989	0	0.0279336	0	0.0769231	0.428481	1.71212e-06	23	0.034058	0	0.0574013	0	0.2	0.653973	3.74219e-06
GRINA_2	228	CG	0.70888	0.739866	0.73629	0.9847(0.9000-1.0773)	-0.00815629	16	0.0326705	0	0.0440489	0	0.1	0.671269	8.28306e-05	24	0.0408267	0	0.0914181	0	0.4	0.523592	9.63236e-08
GRINA_2	232	CG	0.70156	0.980835	0.695614	0.9655(0.8100-1.1509)	-0.00495806	16	0.0101461	0	0.0279516	0	0.0909091	0.412099	4.30604e-07	24	0.0151042	0	0.0458879	0	0.2	0.386094	5.22334e-09
